# Supplementary material for: Prevalence of diarrhoea, acute respiratory infections, and malaria over time (1995-2017): A regional analysis of 23 countries in West and Central Africa
Source: PubMed Central journal article supplement (PMC8397278; doi:10.7189/jogh.11.13008), 2021-08-10

**Figures S1 – S4.** Prevalence of childhood diseases over time, disaggregated by location and gender

**Figure S1.** Prevalence of diarrhoea over time, disaggregated by location and gender.

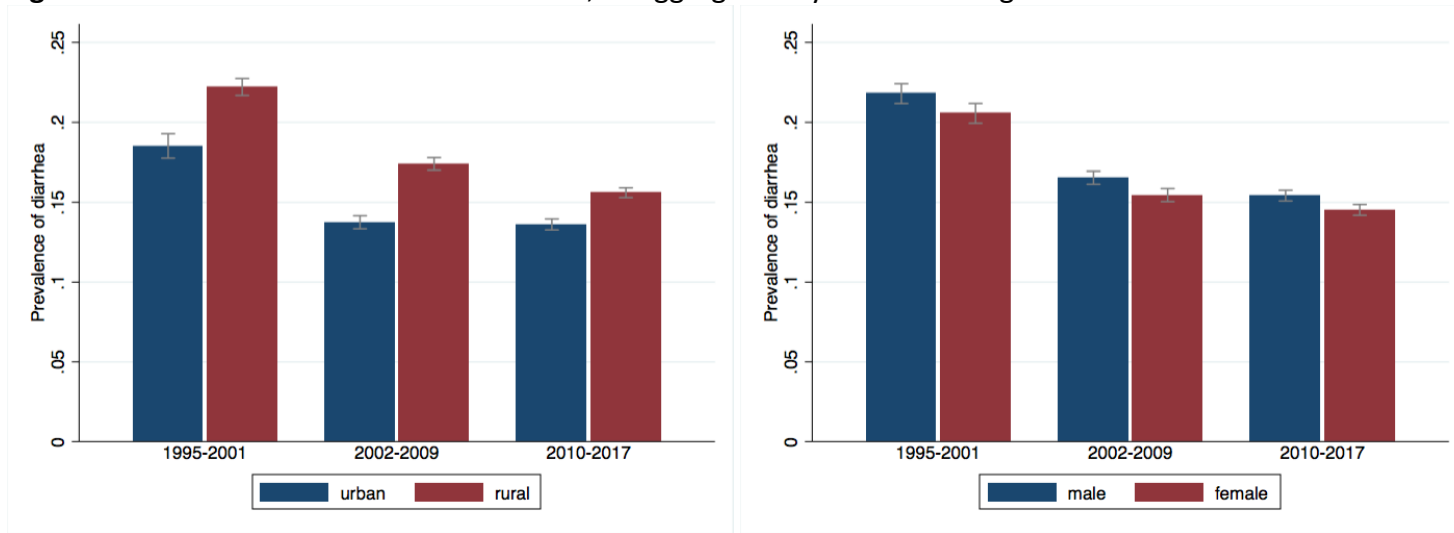

**Figure S2.** Prevalence of acute respiratory infections over time, disaggregated by location and gender.

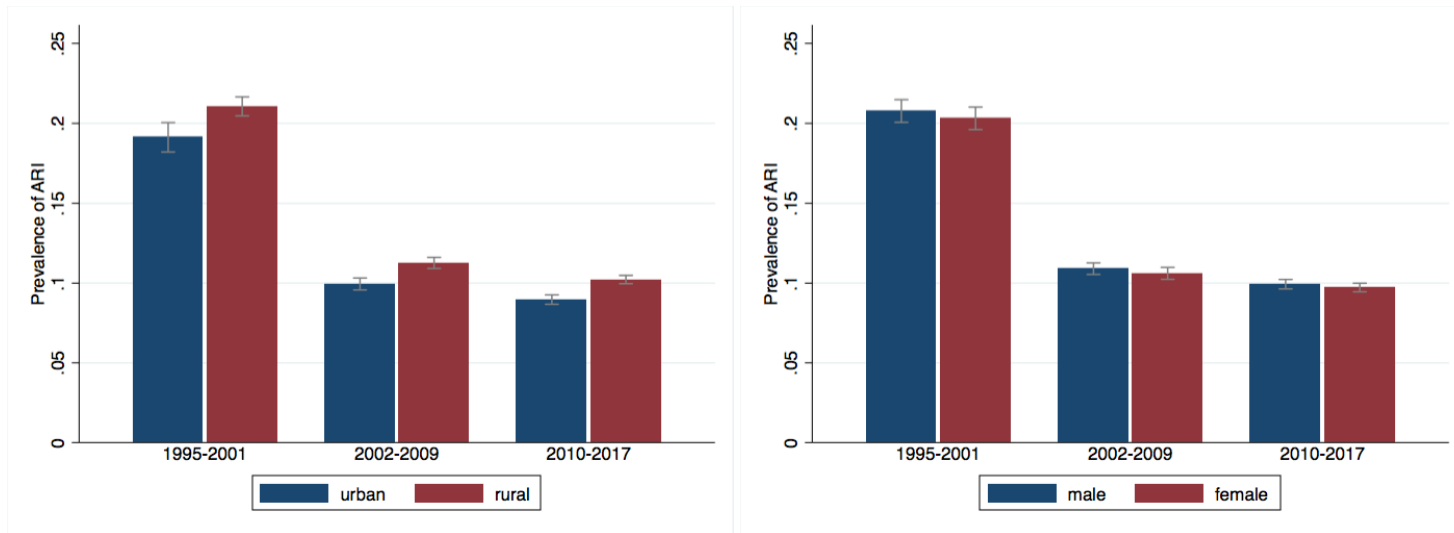

**Figure S3.** Prevalence of fever over time, disaggregated by location and gender

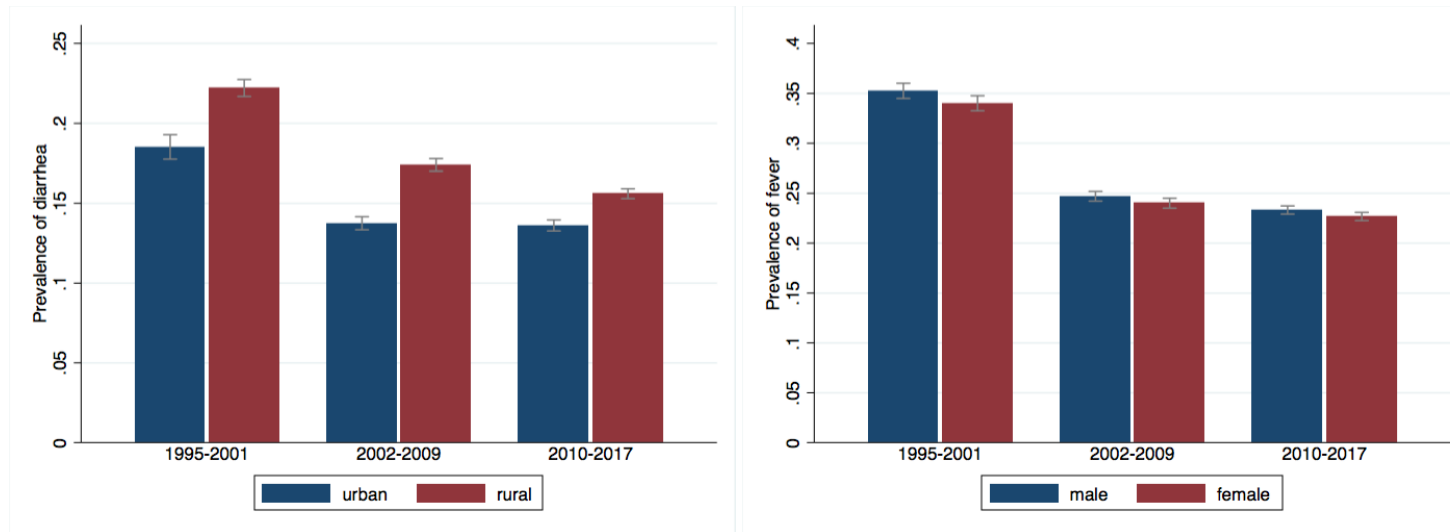

**Figure S4.** Prevalence of malaria over time, disaggregated by location and gender

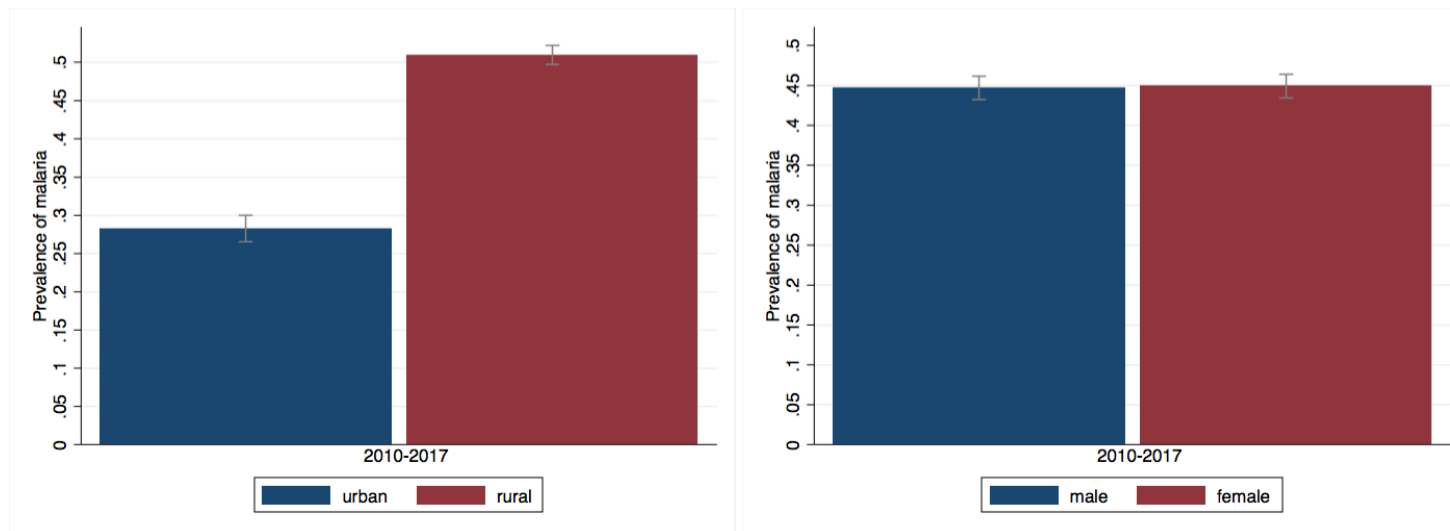

## Figures S5 – S7. Prevalence of childhood diseases over time for all countries

### Figure S5. Prevalence of diarrhoea over time by country

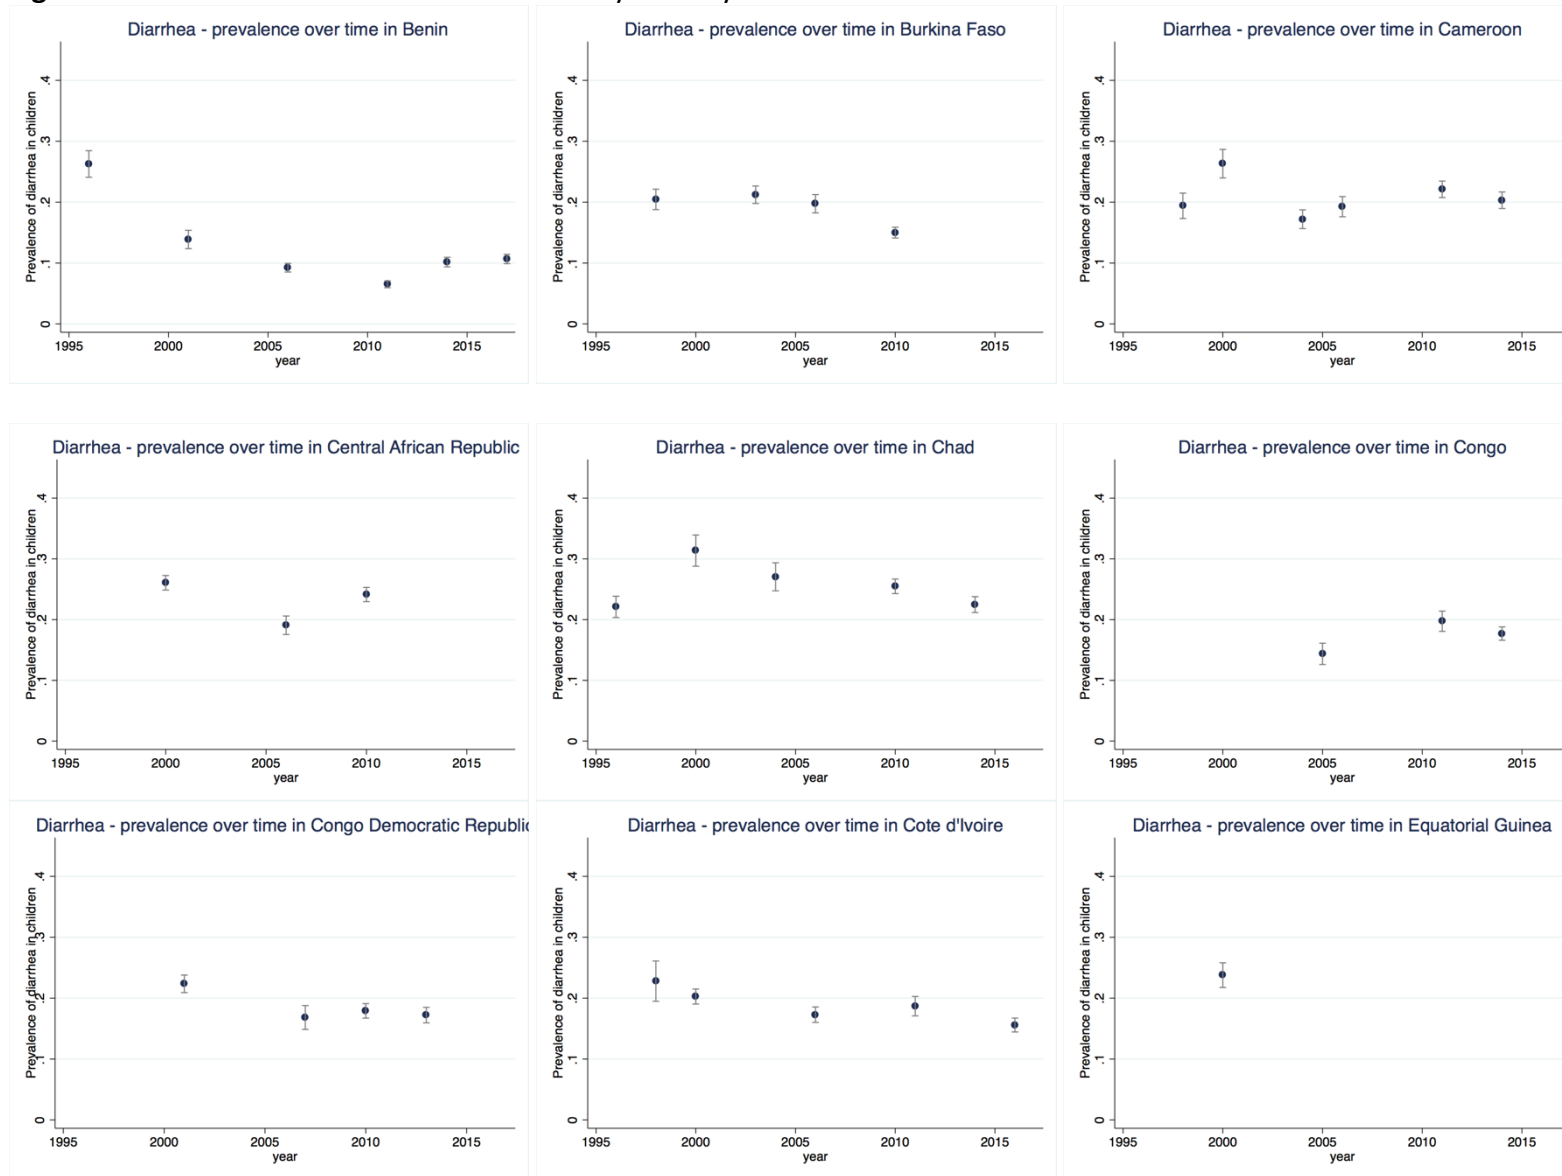

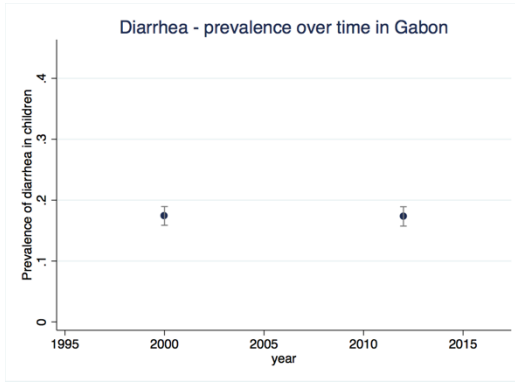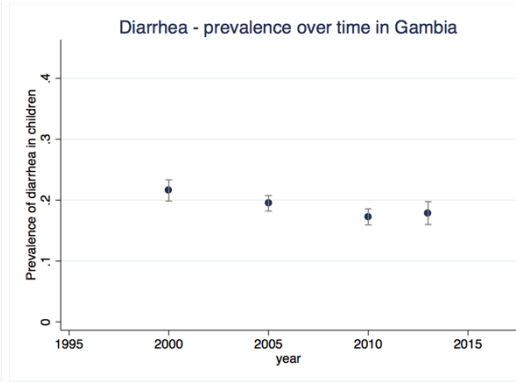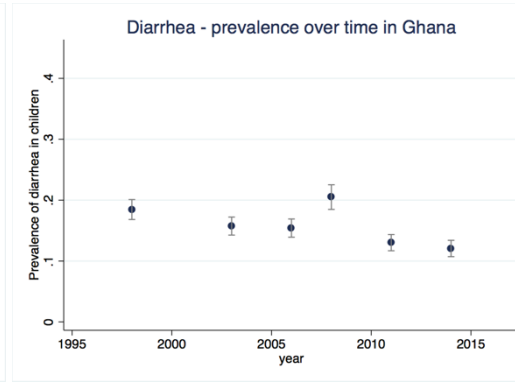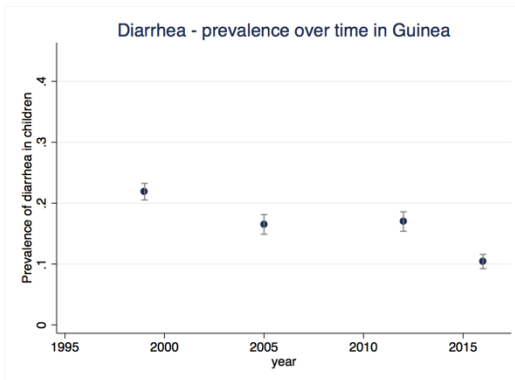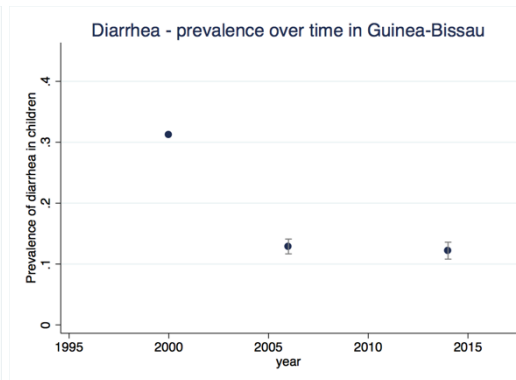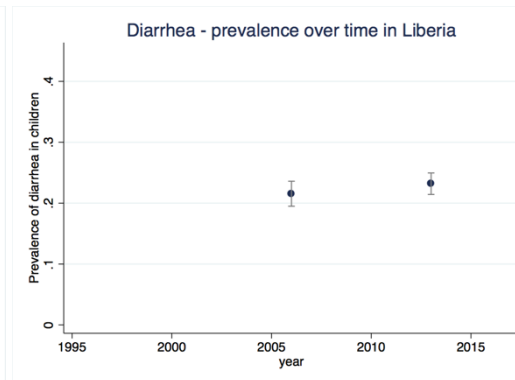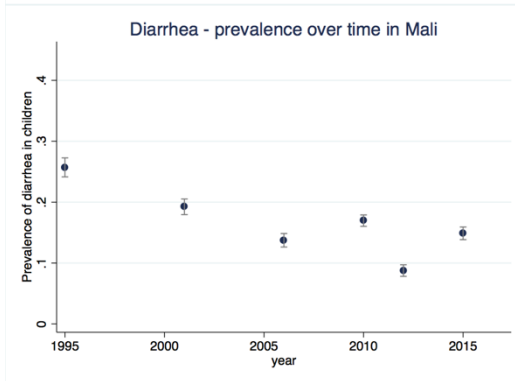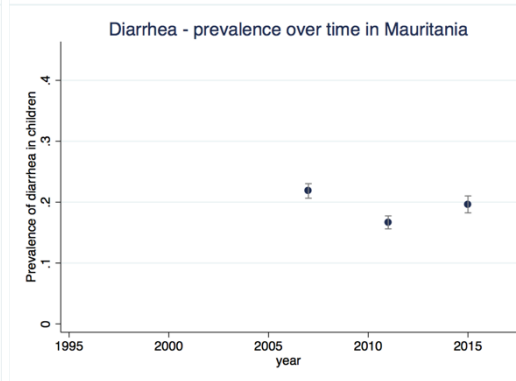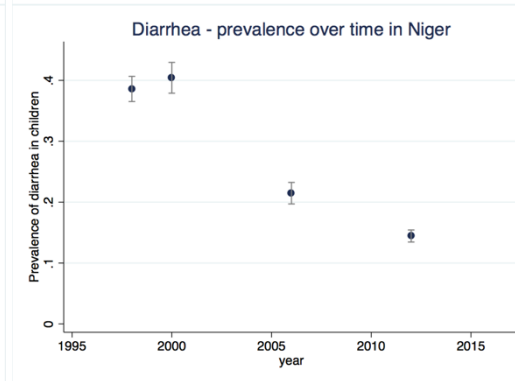

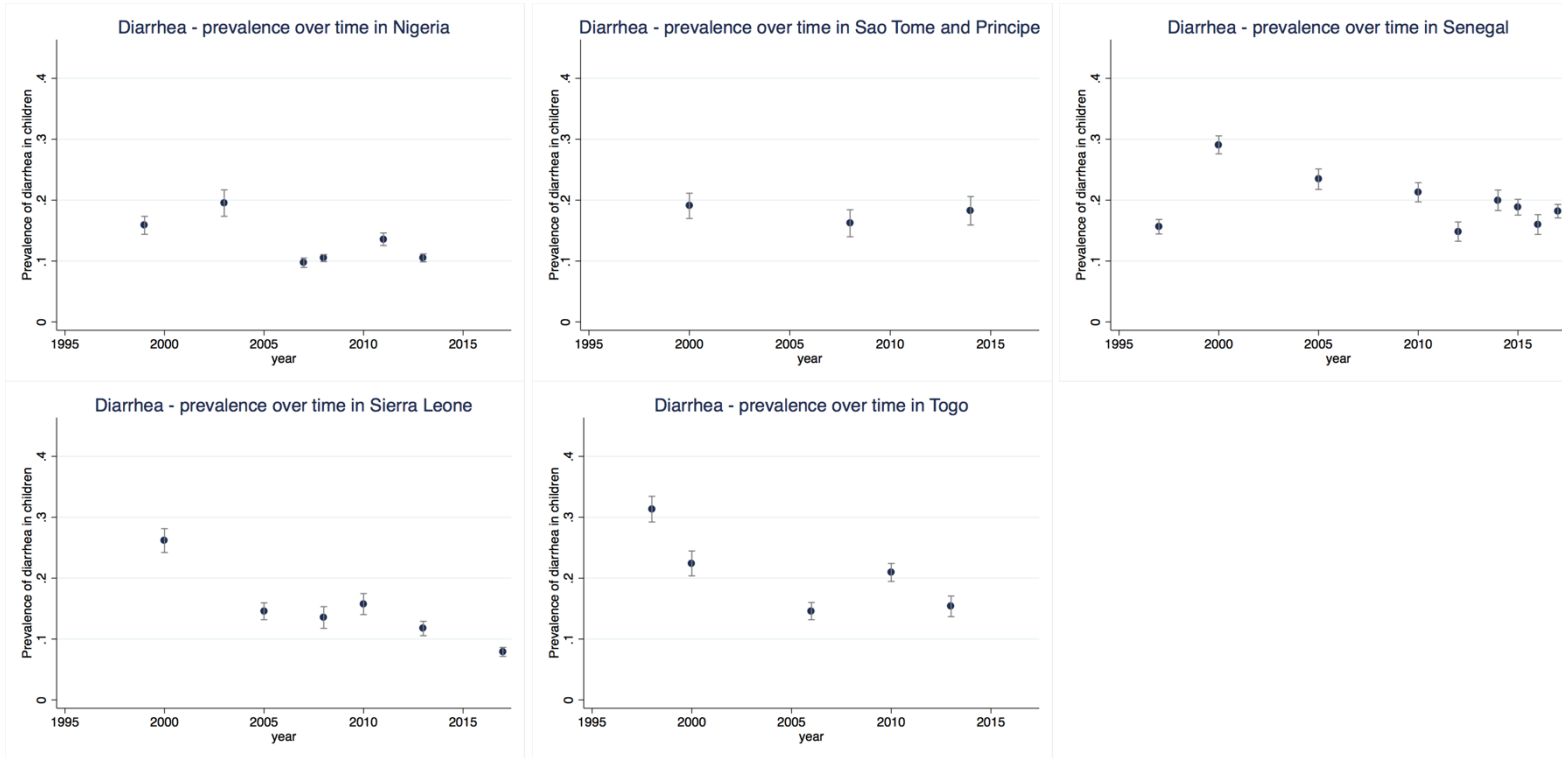

**Figure S6.** Prevalence of acute respiratory infections over time by country.

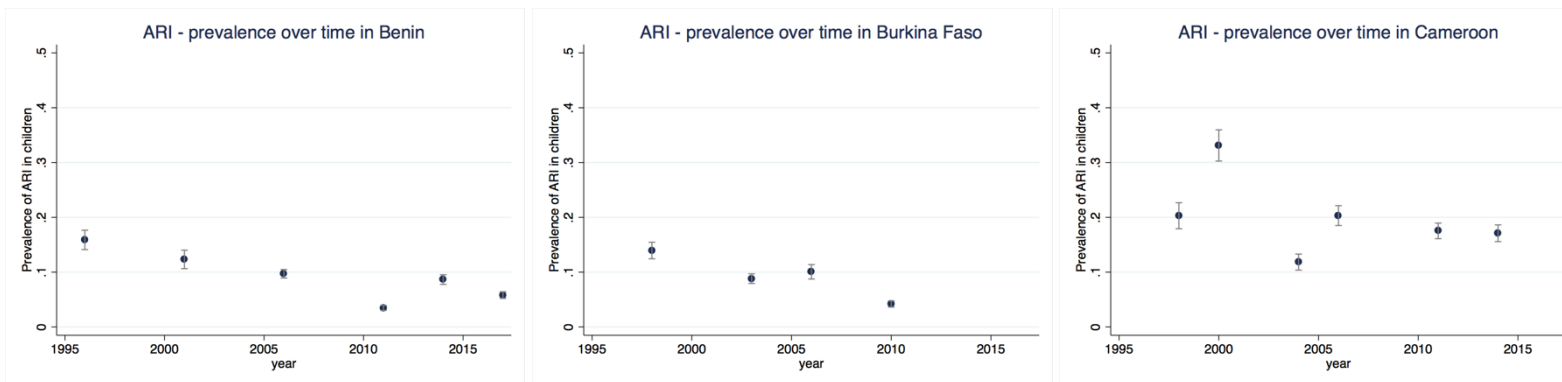

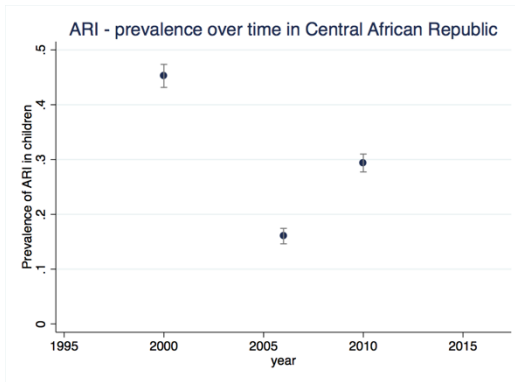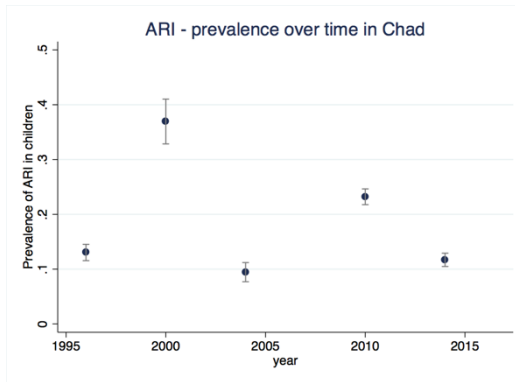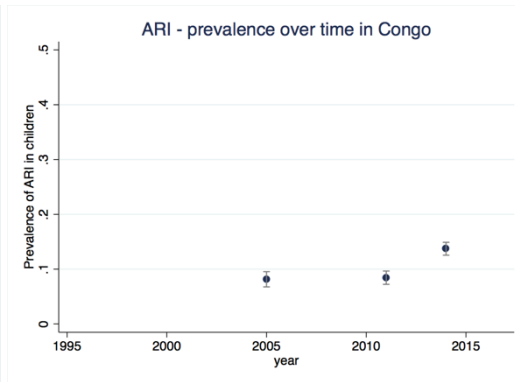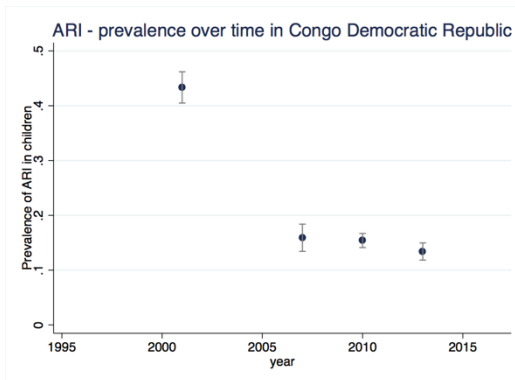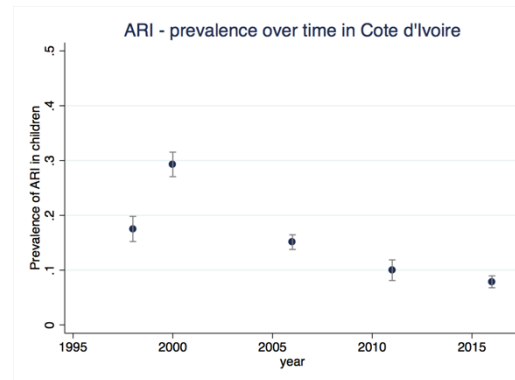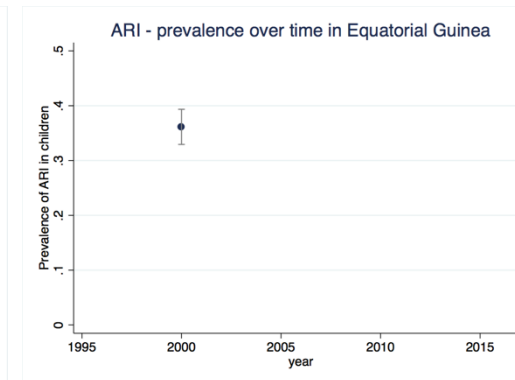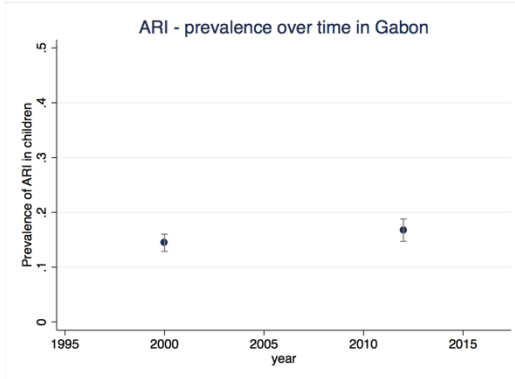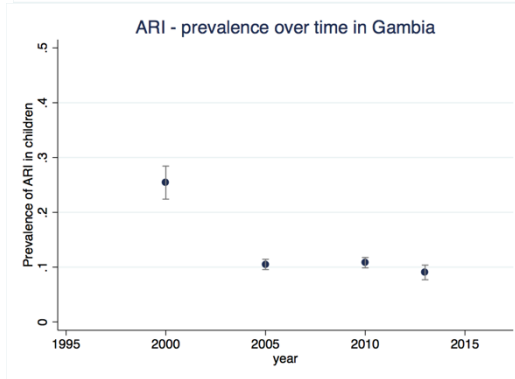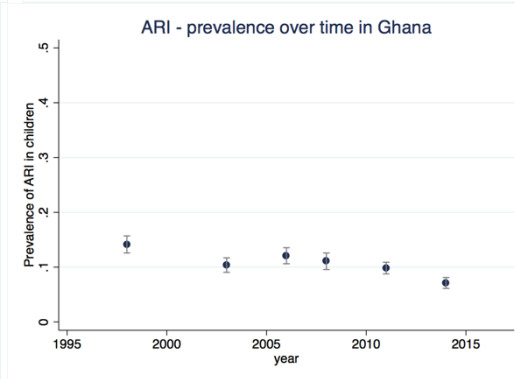

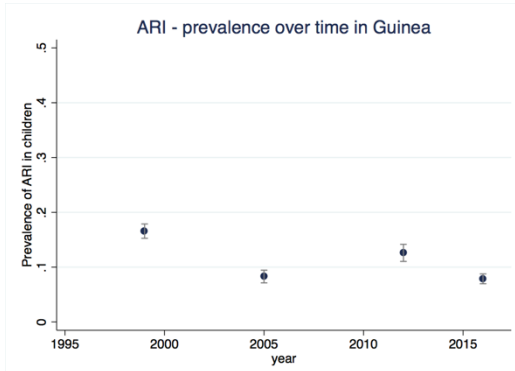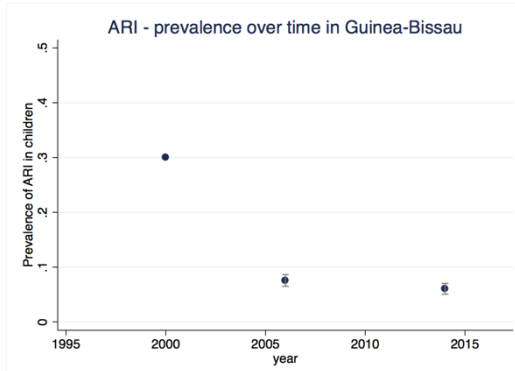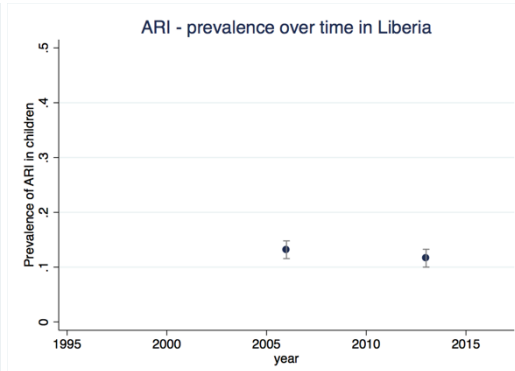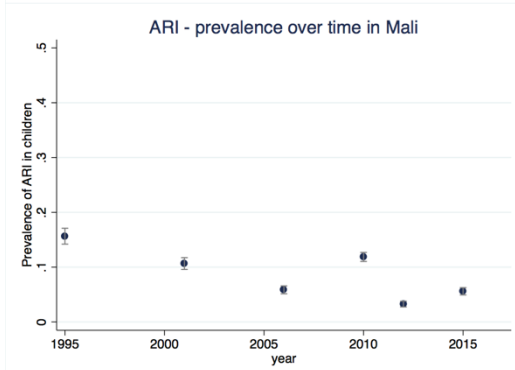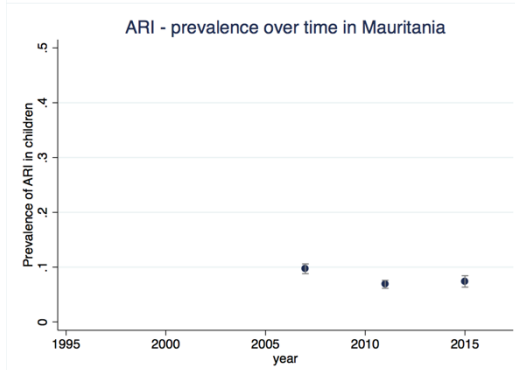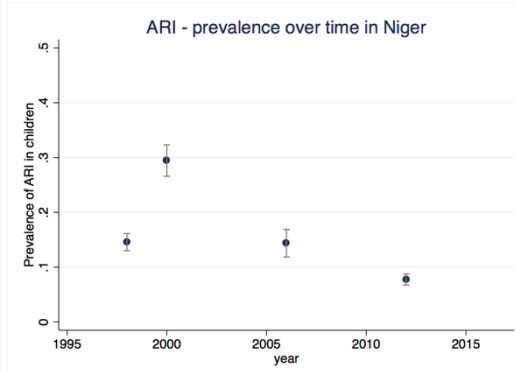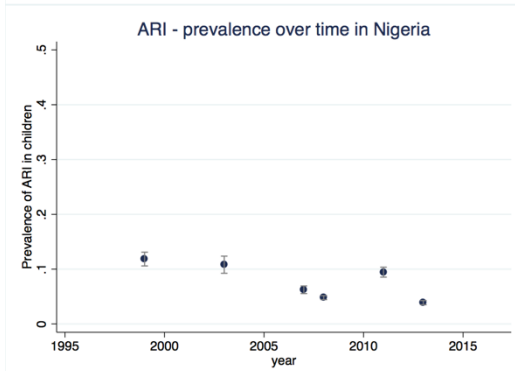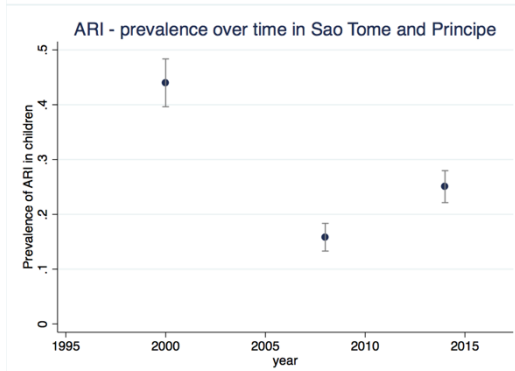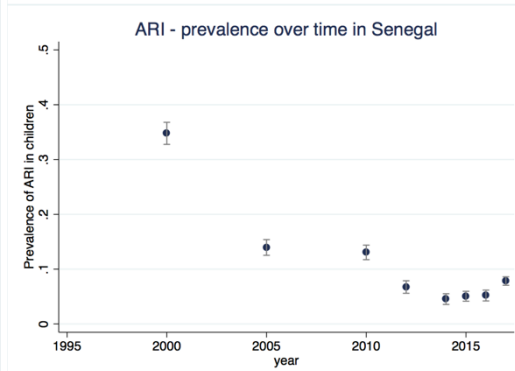

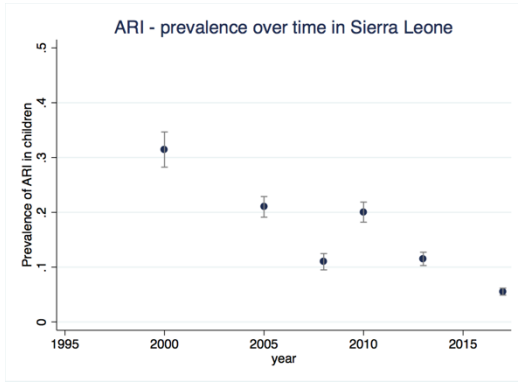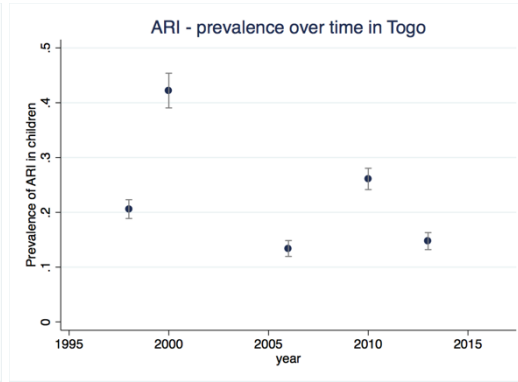

**Figure S7.** Prevalence of fever over time by country.

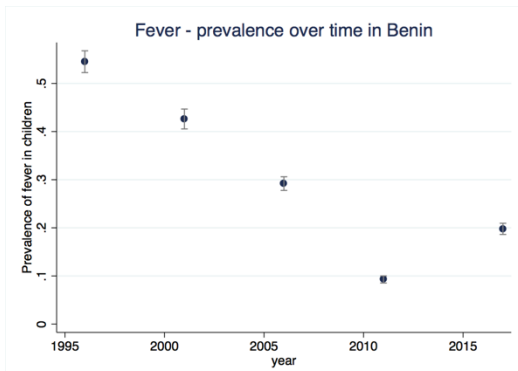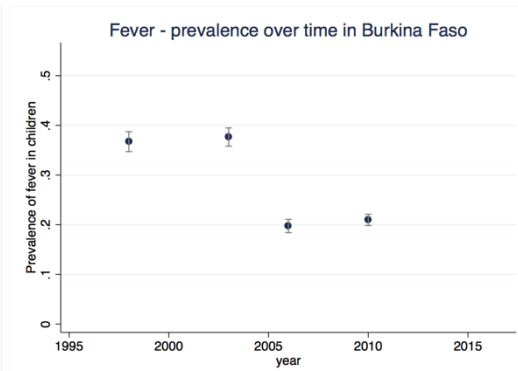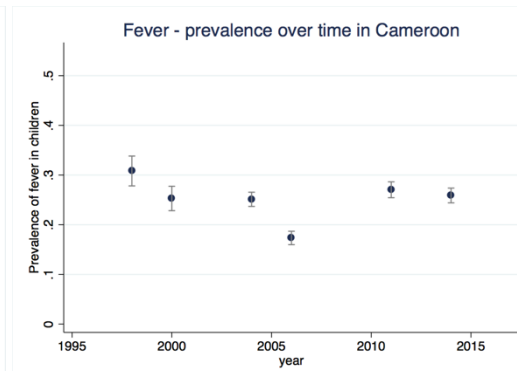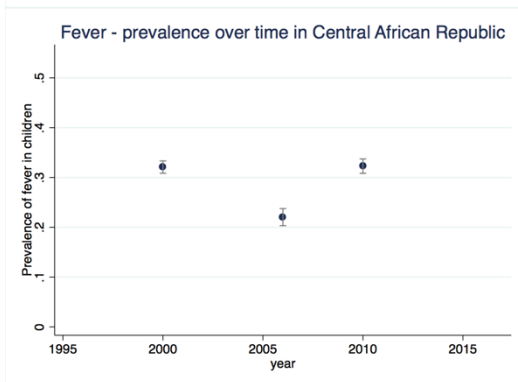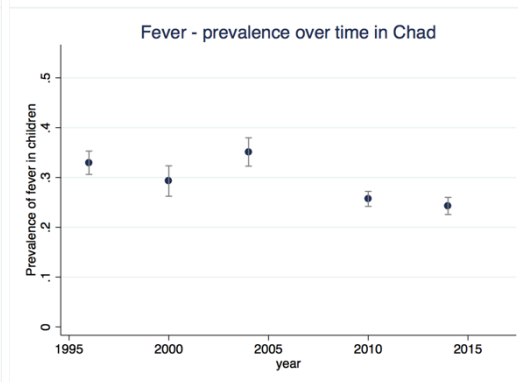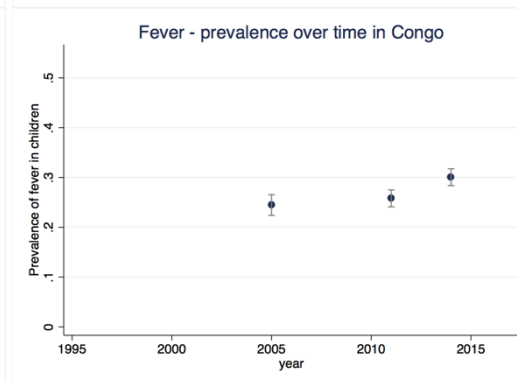



Fever - prevalence over time in Congo Democratic Republic

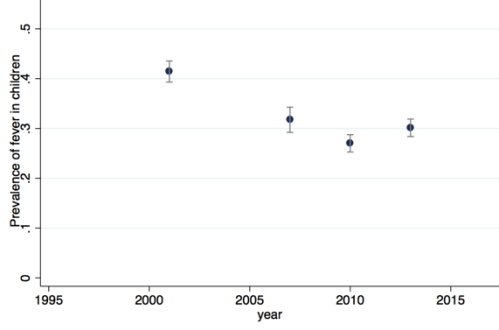

Fever - prevalence over time in Cote d'Ivoire

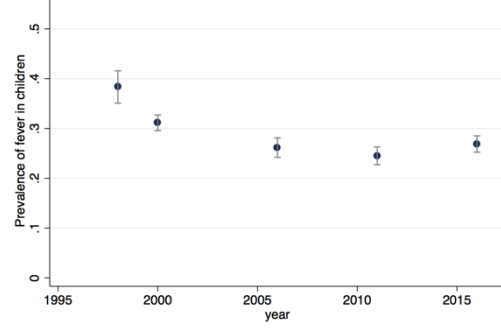

Fever - prevalence over time in Equatorial Guinea

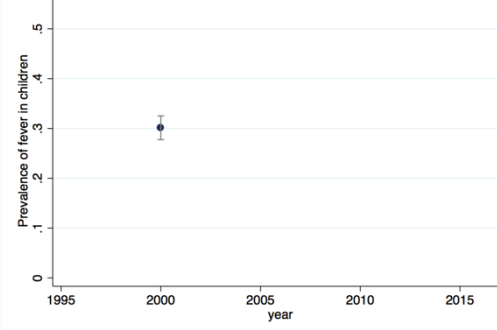

Fever - prevalence over time in Gabon

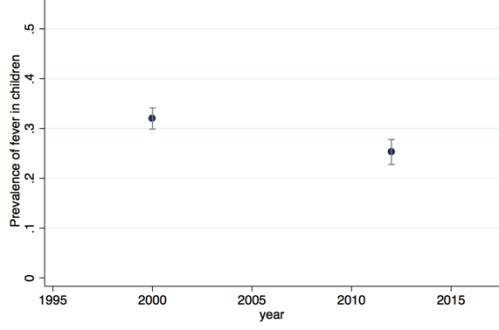

Fever - prevalence over time in Gambia

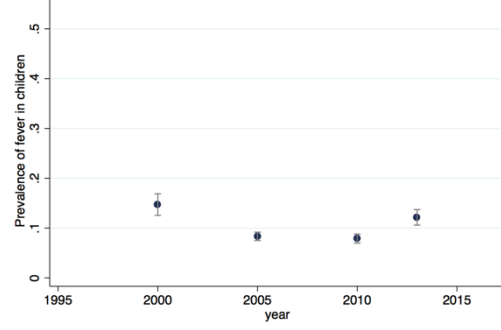

Fever - prevalence over time in Ghana

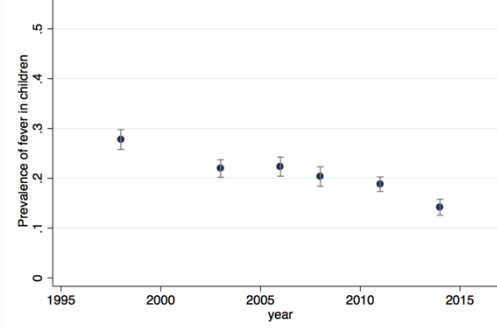

Fever - prevalence over time in Guinea

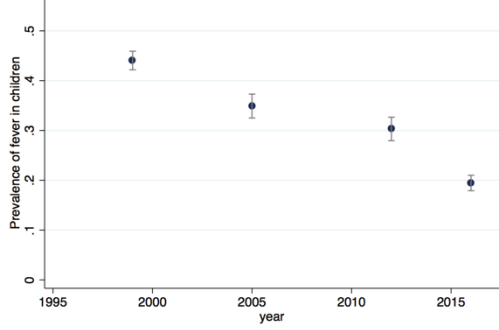

Fever - prevalence over time in Guinea-Bissau

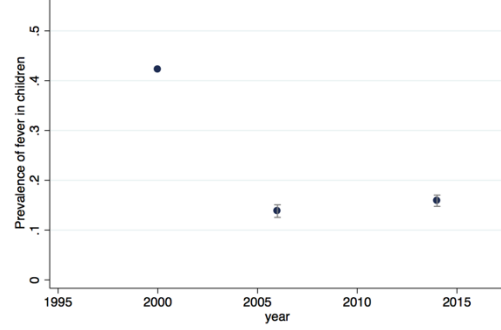

Fever - prevalence over time in Liberia

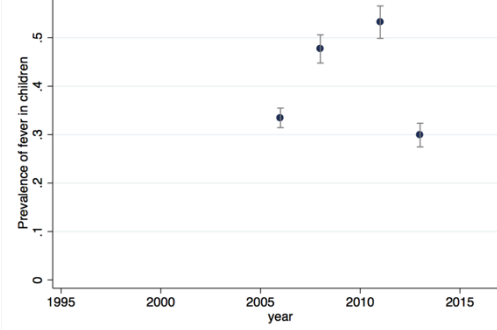

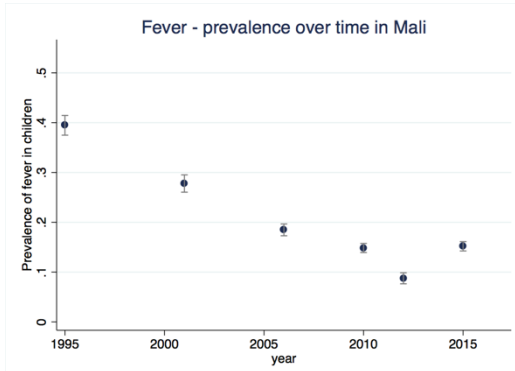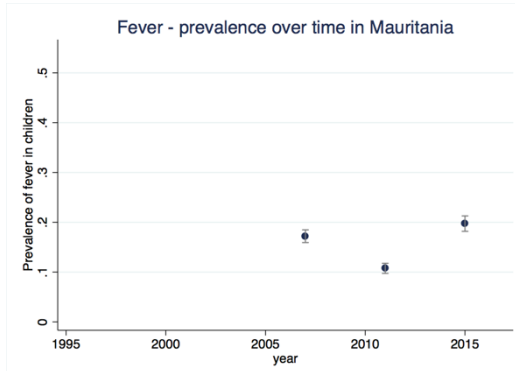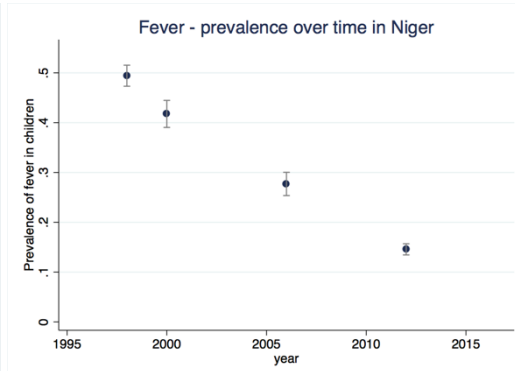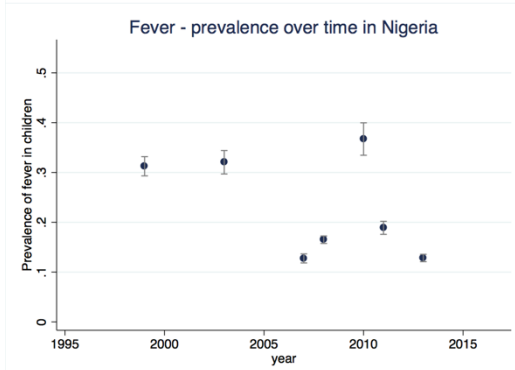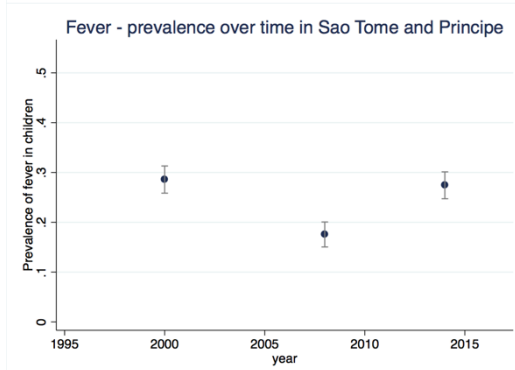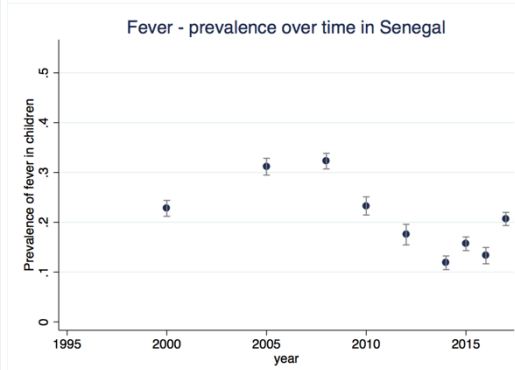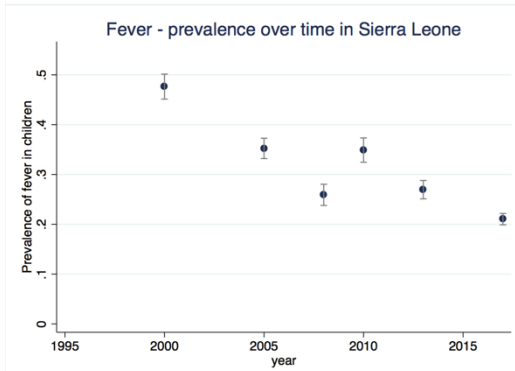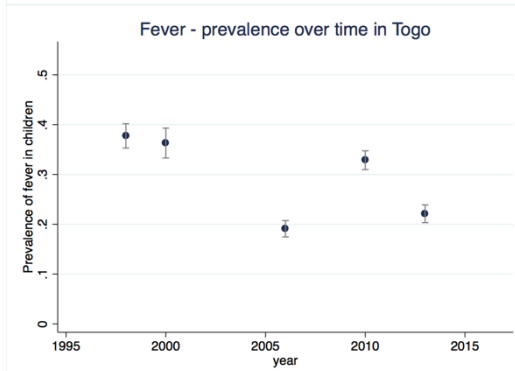

Supplement: jogh-11-13008-s001.pdf [file jogh-11-13008-s001.pdf]
